# Supplementary material for: Digital Gaming for Nutritional Education: A Survey on Preferences, Motives, and Needs of Children and Adolescents
Source: PubMed Central journal article supplement (PMC6391648; doi:10.2196/10284), 2019-02-13
Supplement: formative_v3i1e10284_app2.pdf [file formative_v3i1e10284_app2.pdf]

## Multimedia Appendix 2. Digital gameplay: motives, behavior, and preferences

| Digital gaming                                     |                 | All<br>n (%) | Girls<br>n (%) | Boys<br>n (%) |
|----------------------------------------------------|-----------------|--------------|----------------|---------------|
| <b>Motives</b> <sup>a:1</sup>                      |                 | 282 (100)    |                |               |
| <b>Emotion</b>                                     |                 |              |                |               |
|                                                    | Pleasure        | 209 (74.1)   | 78 (59.5)      | 131 (86.8)    |
|                                                    | Happiness       | 24 (8.5)     | 4 (3.1)        | 20 (13.3)     |
|                                                    | Sadness         | 15 (5.3)     | 7 (5.3)        | 8 (5.3)       |
|                                                    | Boredom         | 164 (58.2)   | 78 (59.5)      | 86 (57.0)     |
| <b>Setting</b>                                     |                 |              |                |               |
|                                                    | Friends         | 54 (19.2)    | 16 (12.2)      | 38 (25.2)     |
|                                                    | School          | 13 (4.6)     | 3 (2.3)        | 10 (6.6)      |
|                                                    | On the go       | 48 (17.0)    | 26 (19.9)      | 22 (14.6)     |
|                                                    | Alone (at home) | 117 (41.5)   | 47 (35.9)      | 70 (46.4)     |
| Other                                              |                 | 9 (3.2)      | 1 (0.8)        | 8 (5.3)       |
| I don't play                                       |                 | 29 (10.3)    | 22 (16.8)      | 7 (4.6)       |
| I don't know                                       |                 | 3 (1.1)      | 2 (1.5)        | 1 (0.7)       |
| <b>Behavior</b>                                    |                 |              |                |               |
| Digital game <sup>b:2</sup>                        |                 | 283 (100)    |                |               |
|                                                    | Yes             | 242 (85.5)   | 104 (78.8)     | 138 (91.4)    |
|                                                    | No              | 41 (14.5)    | 28 (21.2)      | 13 (8.6)      |
| <b>Duration (smartphone, tablet)<sup>a:3</sup></b> |                 |              |                |               |
|                                                    | ≤ 30 minute     | 151 (66.5)   | 64 (58.2)      | 87 (74.4)     |
|                                                    | =60 minute      | 24 (10.6)    | 12 (10.9)      | 12 (10.3)     |
|                                                    | >60 minute      | 17 (7.5)     | 10 (9.1)       | 7 (6.0)       |
|                                                    | I do not play   | 33 (14.5)    | 24 (21.8)      | 9 (7.7)       |
|                                                    | I do not know   | 2 (0.9)      | 0 (0.0)        | 2 (1.7)       |
| <b>Duration (PC, console)<sup>a:4</sup></b>        |                 |              |                |               |
|                                                    | ≤ 30 minute     | 57 (27.3)    | 34 (43.0)      | 23 (17.7)     |
|                                                    | =60 minute      | 63 (30.1)    | 14 (17.7)      | 49 (37.7)     |
|                                                    | >60 minute      | 53 (25.4)    | 6 (7.6)        | 47 (36.2)     |
|                                                    | I do not play   | 35 (16.8)    | 25 (31.7)      | 10 (7.7)      |
|                                                    | I do not know   | 1 (0.5)      | 0 (0.00)       | 1 (0.8)       |

|                                               |                      |            |           |            |
|-----------------------------------------------|----------------------|------------|-----------|------------|
| Frequency (smartphone, tablet) <sup>a:5</sup> |                      | 236 (100)  |           |            |
|                                               | Daily                | 144 (61.0) | 60 (51.7) | 84 (70.0)  |
|                                               | Weekly               | 27 (11.4)  | 17 (14.7) | 10 (8.3)   |
|                                               | Monthly              | 31 (13.1)  | 14 (12.1) | 17 (14.2)  |
|                                               | I do not play        | 31 (13.1)  | 23 (19.8) | 8 (6.7)    |
|                                               | I do not know        | 3 (1.3)    | 2 (1.7)   | 1 (0.8)    |
| Frequency (PC, console) <sup>a:6</sup>        |                      | 204 (100)  |           |            |
|                                               | Daily                | 82 (40.2)  | 21 (28.4) | 61 (46.9)  |
|                                               | Weekly               | 47 (23.0)  | 12 (16.2) | 35 (26.9)  |
|                                               | Monthly              | 39 (19.1)  | 14 (18.9) | 25 (19.2)  |
|                                               | I do not play        | 32 (15.7)  | 24 (32.4) | 8 (6.2)    |
|                                               | I do not know        | 4 (2.0)    | 3 (4.1)   | 1 (0.8)    |
| <b>Preferences</b>                            |                      |            |           |            |
| Team composition <sup>b:7</sup>               |                      | 286 (100)  |           |            |
|                                               | Family               | 78 (27.3)  | 40 (29.4) | 38 (25.3)  |
|                                               | Friends              | 191 (66.8) | 87 (64.0) | 104 (69.3) |
|                                               | Same hobbies         | 97 (33.9)  | 41 (30.2) | 56 (37.3)  |
|                                               | Same eating behavior | 106 (37.1) | 57 (41.9) | 49 (32.7)  |
|                                               | No similarities      | 37 (12.9)  | 16 (11.8) | 21 (14.0)  |
|                                               | Other                | 9 (3.2)    | 4 (2.9)   | 5 (3.3)    |
|                                               | No team              | 21 (7.4)   | 11 (8.1)  | 10 (6.7)   |
| Team mates <sup>b:8</sup>                     |                      | 255 (100)  |           |            |
|                                               | ≤ 5                  | 116 (45.5) | 38 (34.2) | 78 (54.2)  |
|                                               | 6-10                 | 23 (9.0)   | 4 (3.6)   | 19 (13.2)  |
|                                               | >10                  | 27 (10.6)  | 7 (6.3)   | 20 (13.9)  |
|                                               | Alone                | 58 (22.8)  | 40 (36.0) | 18 (12.5)  |
|                                               | I do not play        | 28 (11.0)  | 20 (18.0) | 8 (5.6)    |
|                                               | I do not know        | 3 (1.2)    | 2 (1.8)   | 1 (0.7)    |
| Game character <sup>a:9</sup>                 |                      | 277 (100)  |           |            |
|                                               | Cute animal          | 16 (5.8)   | 6 (4.7)   | 10 (6.7)   |
|                                               | Impressive animal    | 28 (10.1)  | 14 (10.9) | 14 (9.4)   |
|                                               | Fantasy animal       | 14 (5.1)   | 8 (6.3)   | 6 (4.0)    |
|                                               | Fantasy character    | 53 (19.1)  | 27 (21.1) | 26 (17.5)  |
|                                               | Human being          | 119 (43.0) | 53 (41.4) | 66 (44.3)  |
|                                               | Other                | 21 (7.6)   | 8 (6.3)   | 13 (8.7)   |
|                                               | No answer applies.   | 26 (9.4)   | 12 (9.4)  | 14 (9.4)   |

| Nutritional game            |                   |            |           |           |
|-----------------------------|-------------------|------------|-----------|-----------|
| Information <sup>a;10</sup> |                   | 280 (100)  |           |           |
|                             | Yes               | 144 (51.4) | 82 (62.1) | 62 (41.9) |
|                             | No                | 136 (48.6) | 50 (37.9) | 86 (58.1) |
| Learning <sup>b;11</sup>    |                   | 287 (100)  |           |           |
|                             | Quiz              | 157 (54.7) | 94 (69.1) | 63 (41.7) |
|                             | Task              | 123 (42.9) | 74 (54.4) | 49 (32.5) |
|                             | Movies            | 66 (23.0)  | 33 (24.3) | 33 (21.9) |
|                             | Mates             | 55 (19.2)  | 24 (17.7) | 31 (20.5) |
|                             | Other             | 9 (3.1)    | 1 (0.7)   | 8 (5.3)   |
|                             | No learning       | 37 (12.9)  | 8 (5.9)   | 29 (19.2) |
|                             | No answer applies | 16 (5.6)   | 5 (3.7)   | 11 (7.3)  |

PC, personal computer; <sup>a</sup>Single response allowed. <sup>b</sup>Multiple responses allowed.

<sup>1</sup>When do you often play digital games?

<sup>2</sup>Do you play digital games (smartphone, PC, console, apps)?

<sup>3</sup>How long do you play digital games on your smartphone/tablet/apps without any interruption?

<sup>4</sup>How long do you play digital games on your PC/console without any interruption?

<sup>5</sup>How often do you play digital games on your smartphone/tablet/apps?

<sup>6</sup>How often do you play digital games on your PC/console?

<sup>7</sup>In a digital game about "nutrition," goals are to be achieved together in a team. Who should the players on this team be?

<sup>8</sup>With how many players (in the game) do you like to play digital games at the same time?

<sup>9</sup>Which character would you like best in a digital game?

<sup>10</sup>Do you like to receive nutrition information in a digital game?

<sup>11</sup>How would you like to learn about nutrition in a digital game?
